# Supplementary material for: Responsiveness to Influenza Vaccination Correlates with NKG2C-Expression on NK Cells
Source: MDPI journal article supplement (doi:10.3390/vaccines8020281), 2020-06-05
Supplement: s1 [file s1]

# Supplementary Materials:

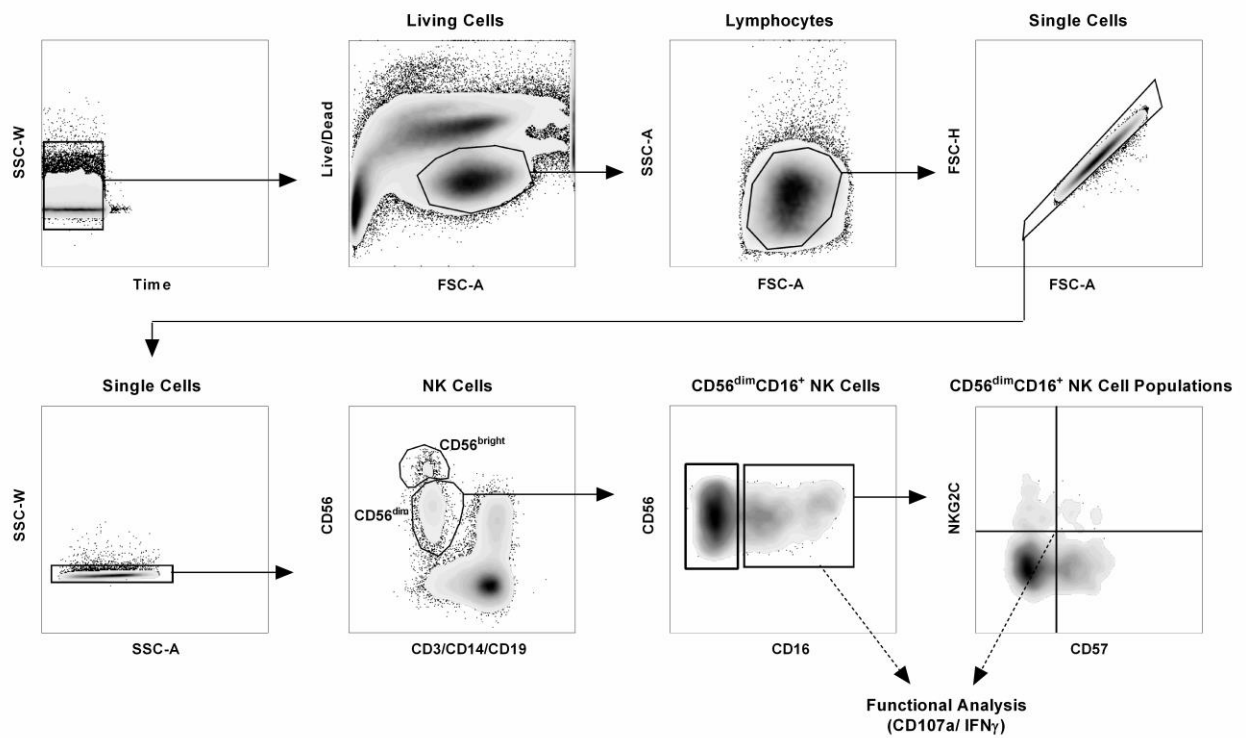

**Figure S1.** Gating Strategy. Measurement inconsistencies were excluded by using a time gate. Living single cell lymphocytes were gated on lineage negative (CD3/CD14/CD19) and CD56<sup>bright</sup> and CD56<sup>dim</sup> NK cells that were further characterized by the expression of CD16, CD57 and NKG2C and functionally analyzed.

Figure S2

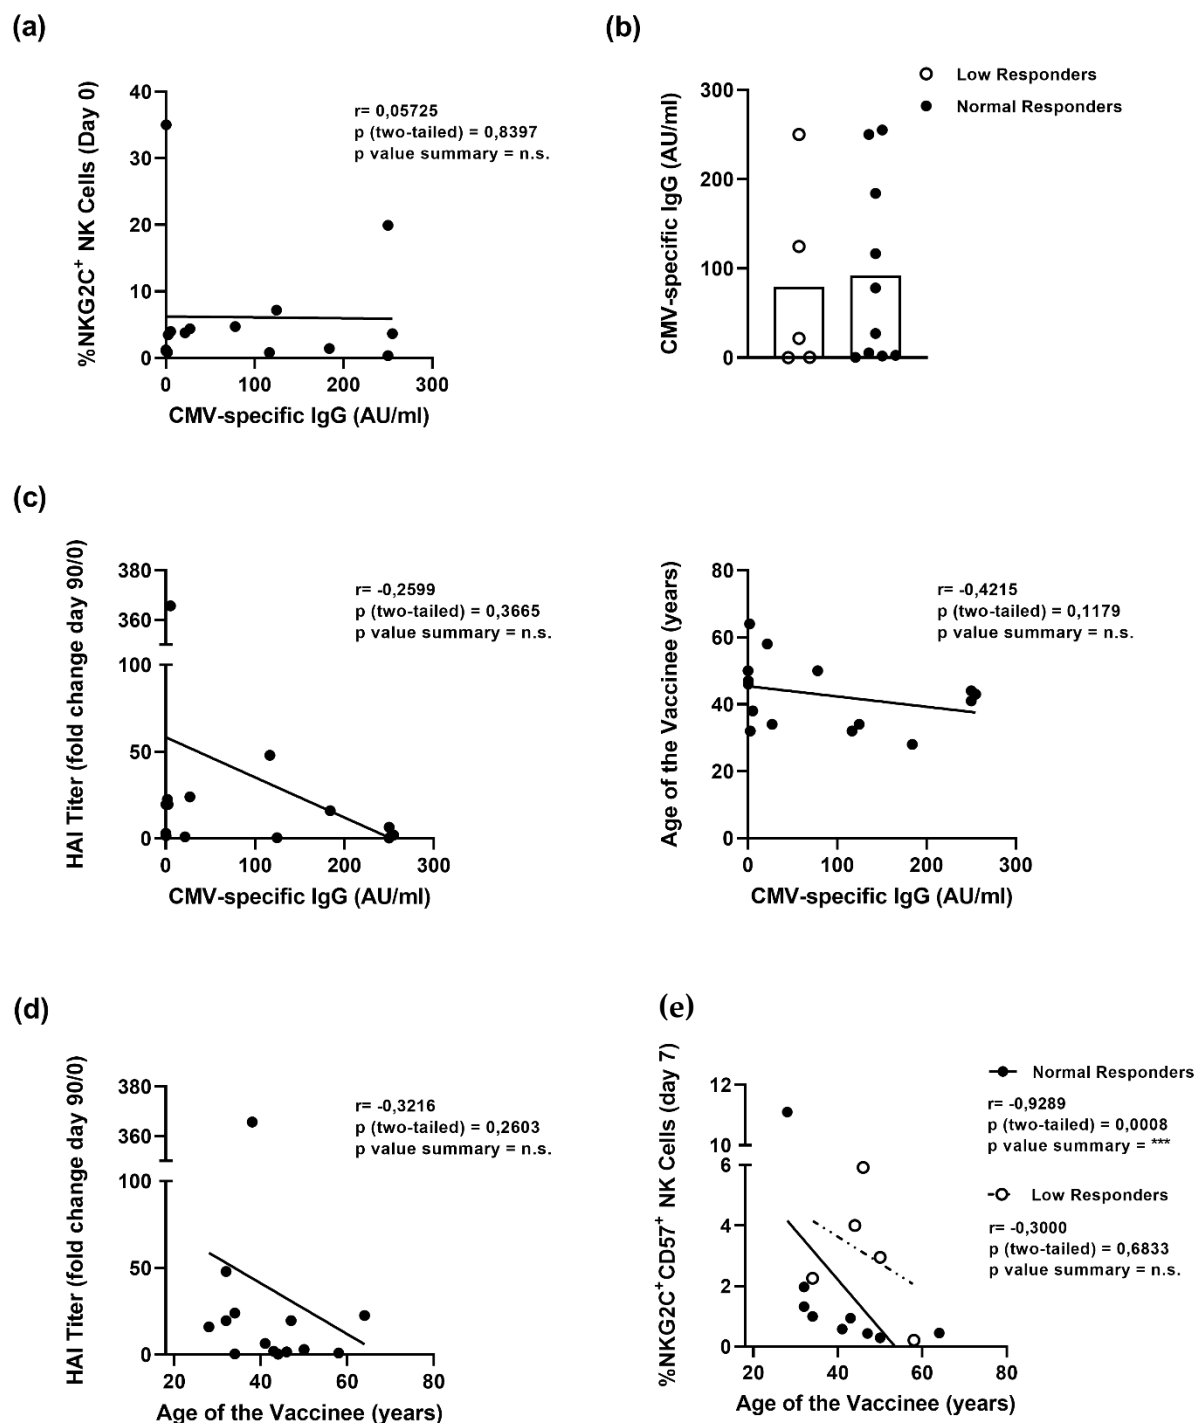

**Figure S2.** Correlation analyses. Serum samples were assessed for the titer (AU/ml) of CMV-specific IgG antibodies. (a) Correlation of NKG2C<sup>+</sup> NK cells (percentage) before vaccination (day 0, assessed by flow cytometry) with the CMV-specific IgG titer. (b) CMV-specific IgG titer of vaccinees stratified into normal and low responders according to their HAI titer. (c) Correlation of the HAI titer fold change as well as the age of the vaccinees with the CMV-specific IgG titer. (d) Correlation of the HAI titer fold change and (e) of NKG2C<sup>+</sup> NK cells (percentage) 7 days post vaccination (assessed by flow cytometry) with the age of the vaccinees. Asterisks denote significant values as calculated by Spearman correlation.

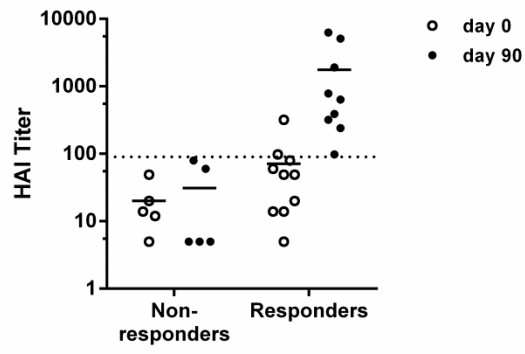

**Figure S3.** Classification of vaccine responders and non-responders. The vaccinated healthy volunteers were classified into responders and non-responders according to their HAI-titer 90 days after a single dose of the pandemic vaccine. The dashed line depicts the cut off-value dividing the two vaccine responsiveness groups.
